# Supplementary figures and images for: Global Internet Data on the Interest in Antibiotics and Probiotics Generated by Google Trends
Source: MDPI journal article supplement (doi:10.3390/antibiotics8030147), 2019-09-12

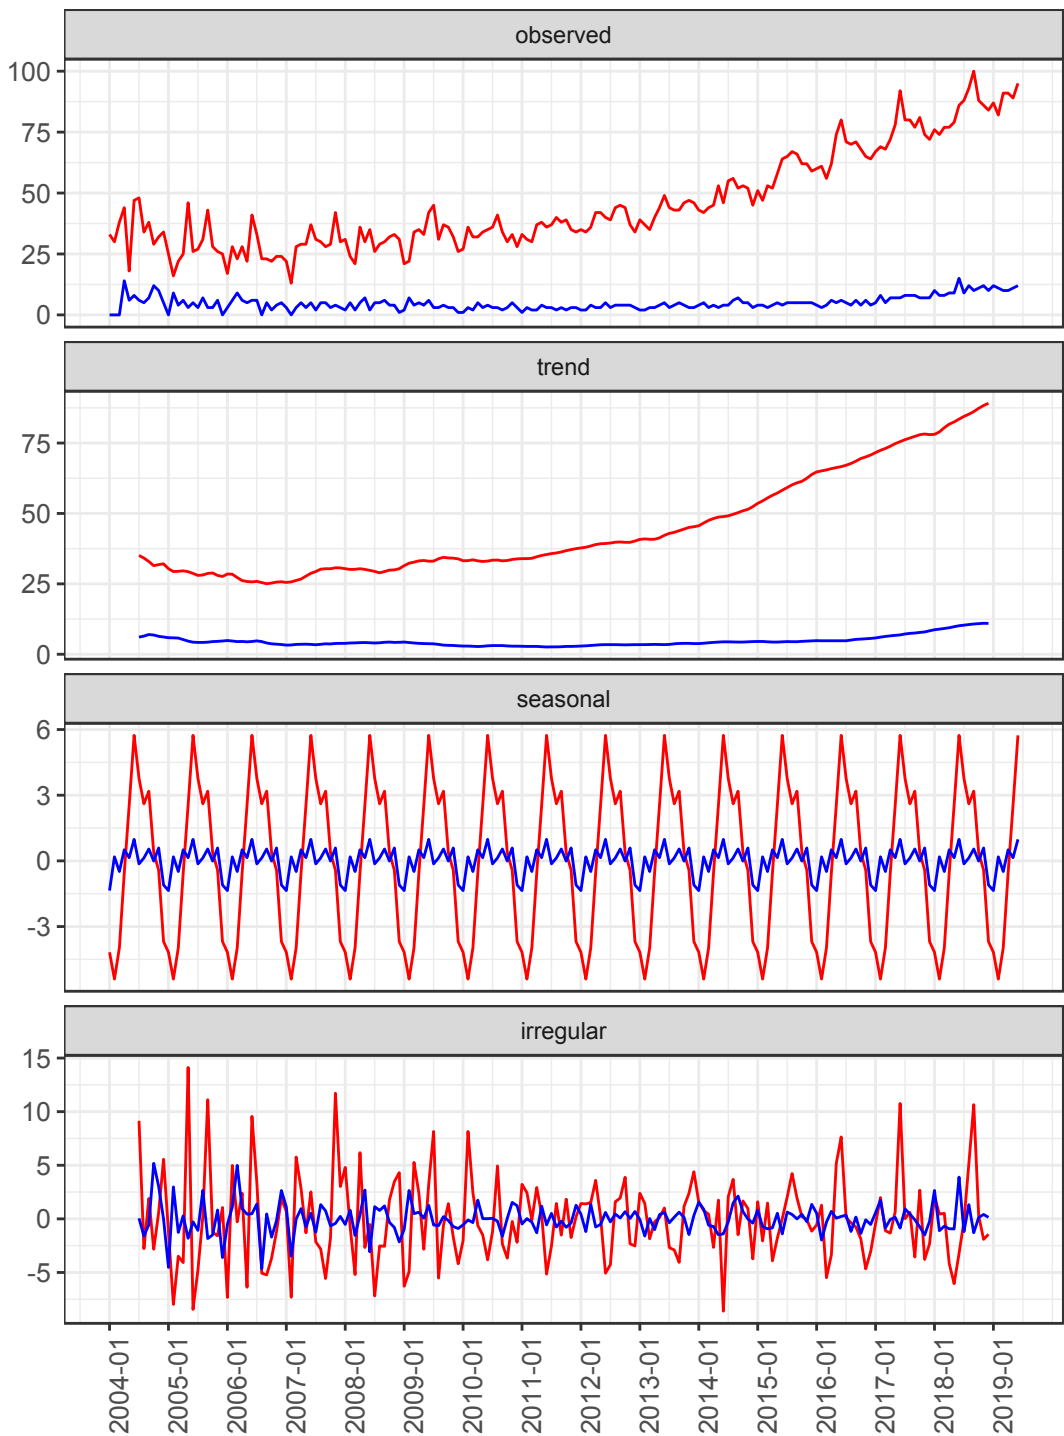

Keyword topic — Antibiotic — Probiotic

Supplement: s1 [file s1]

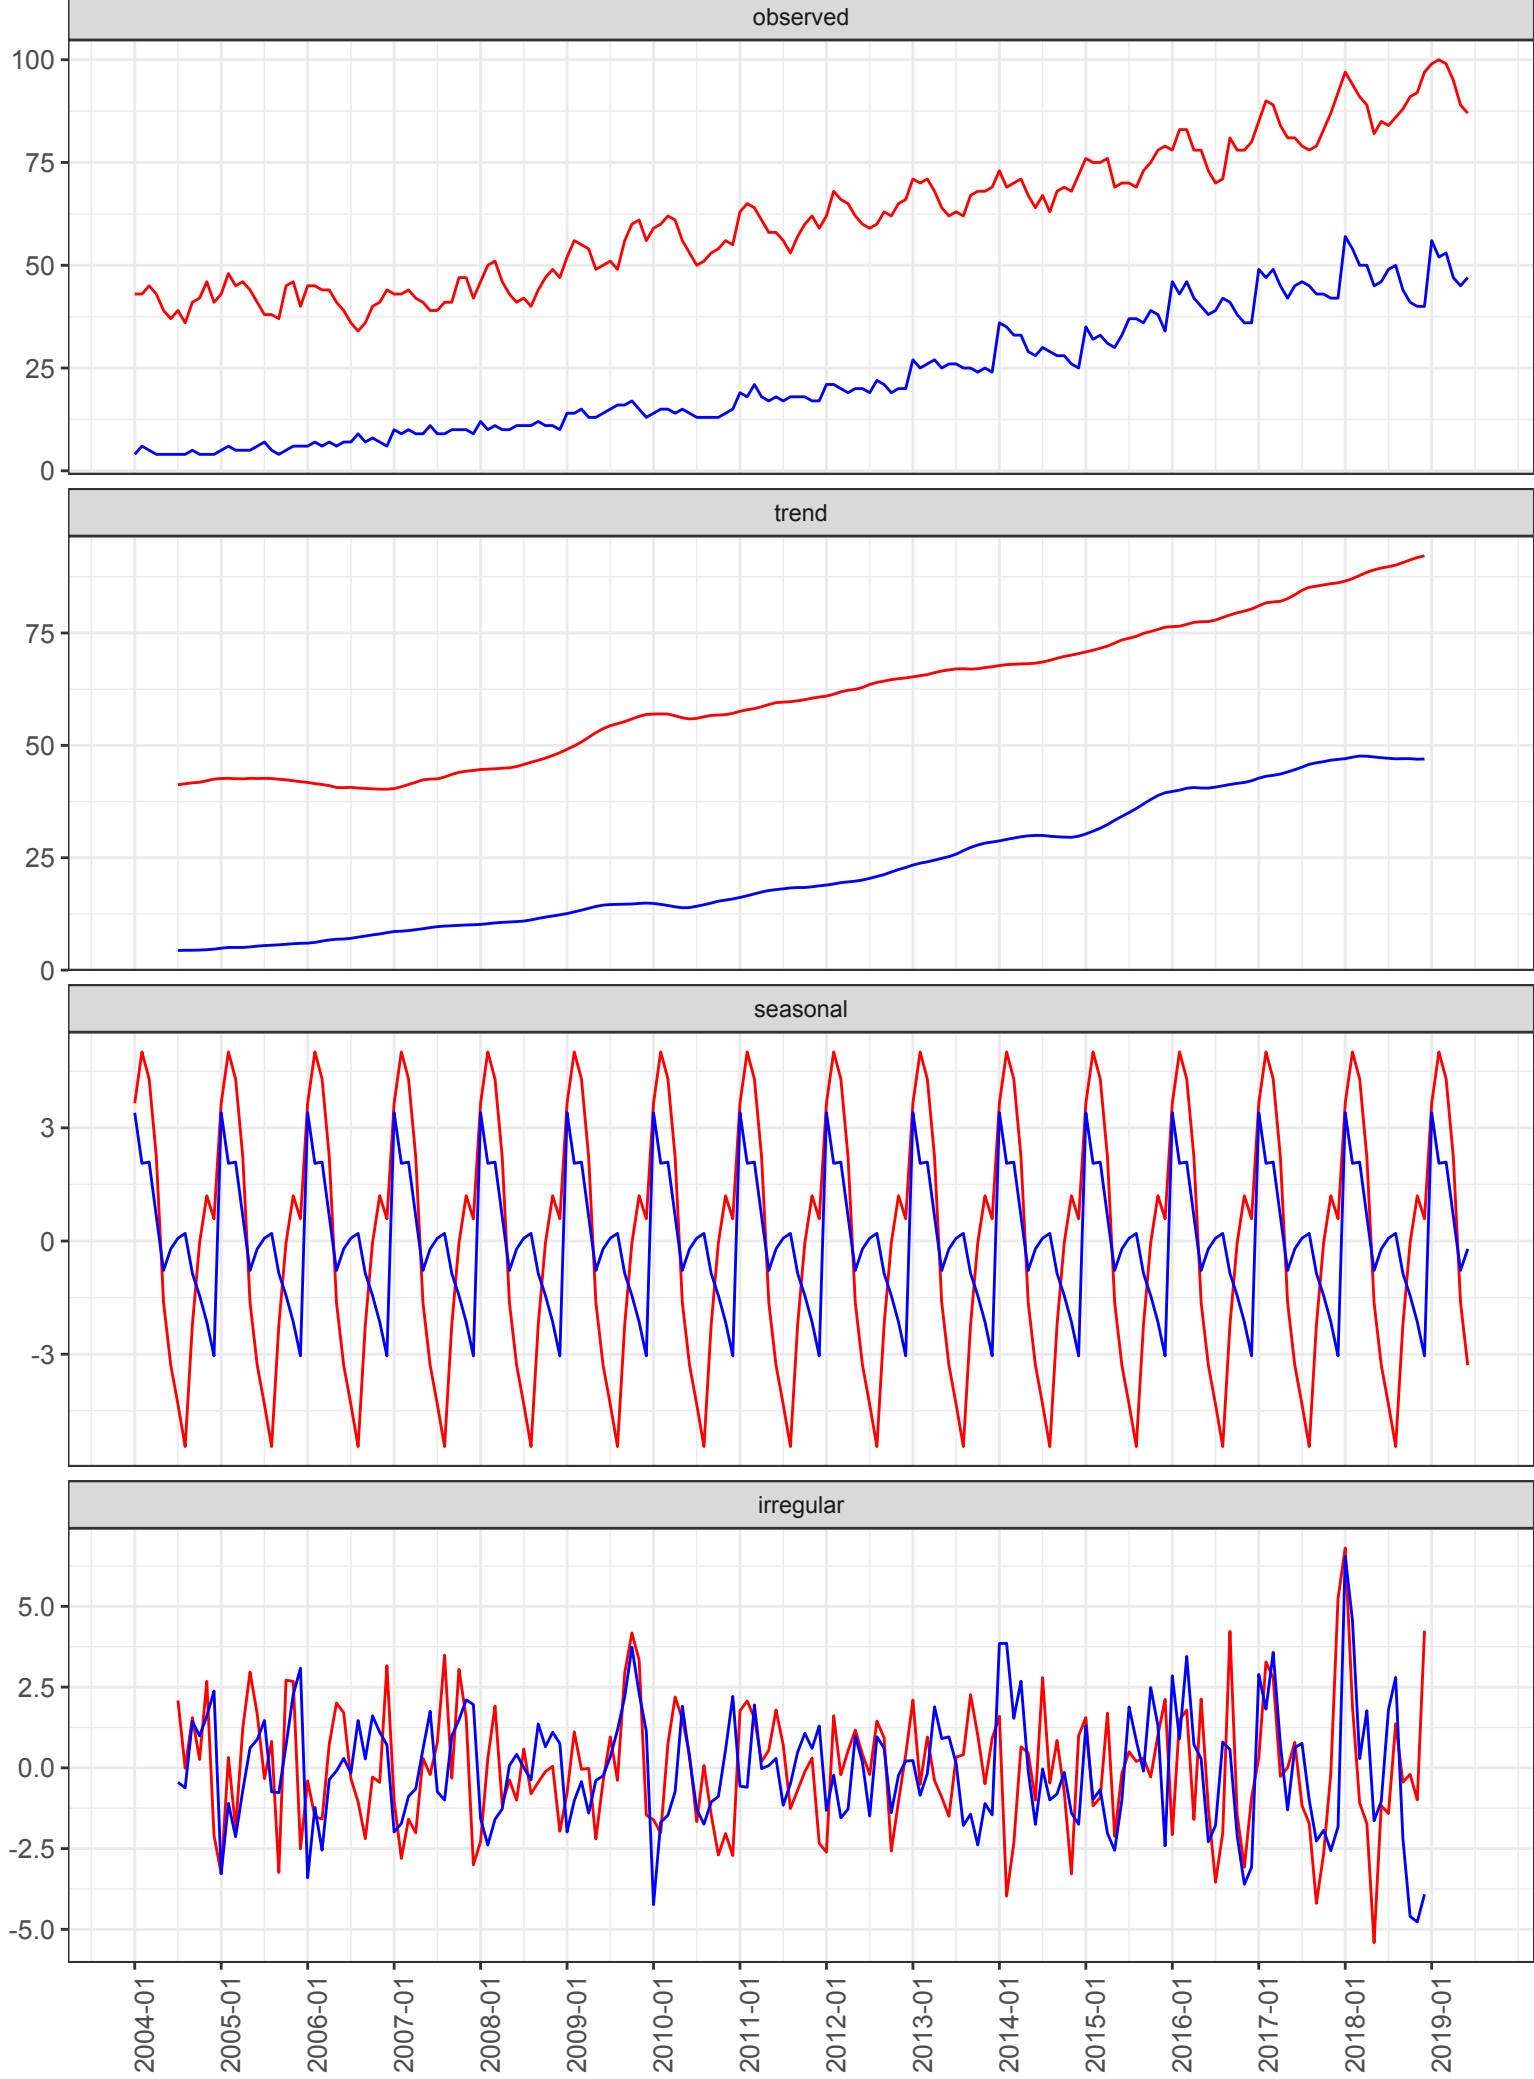

Keyword topic — Antibiotic — Probiotic

Supplement: s1 [file s1]

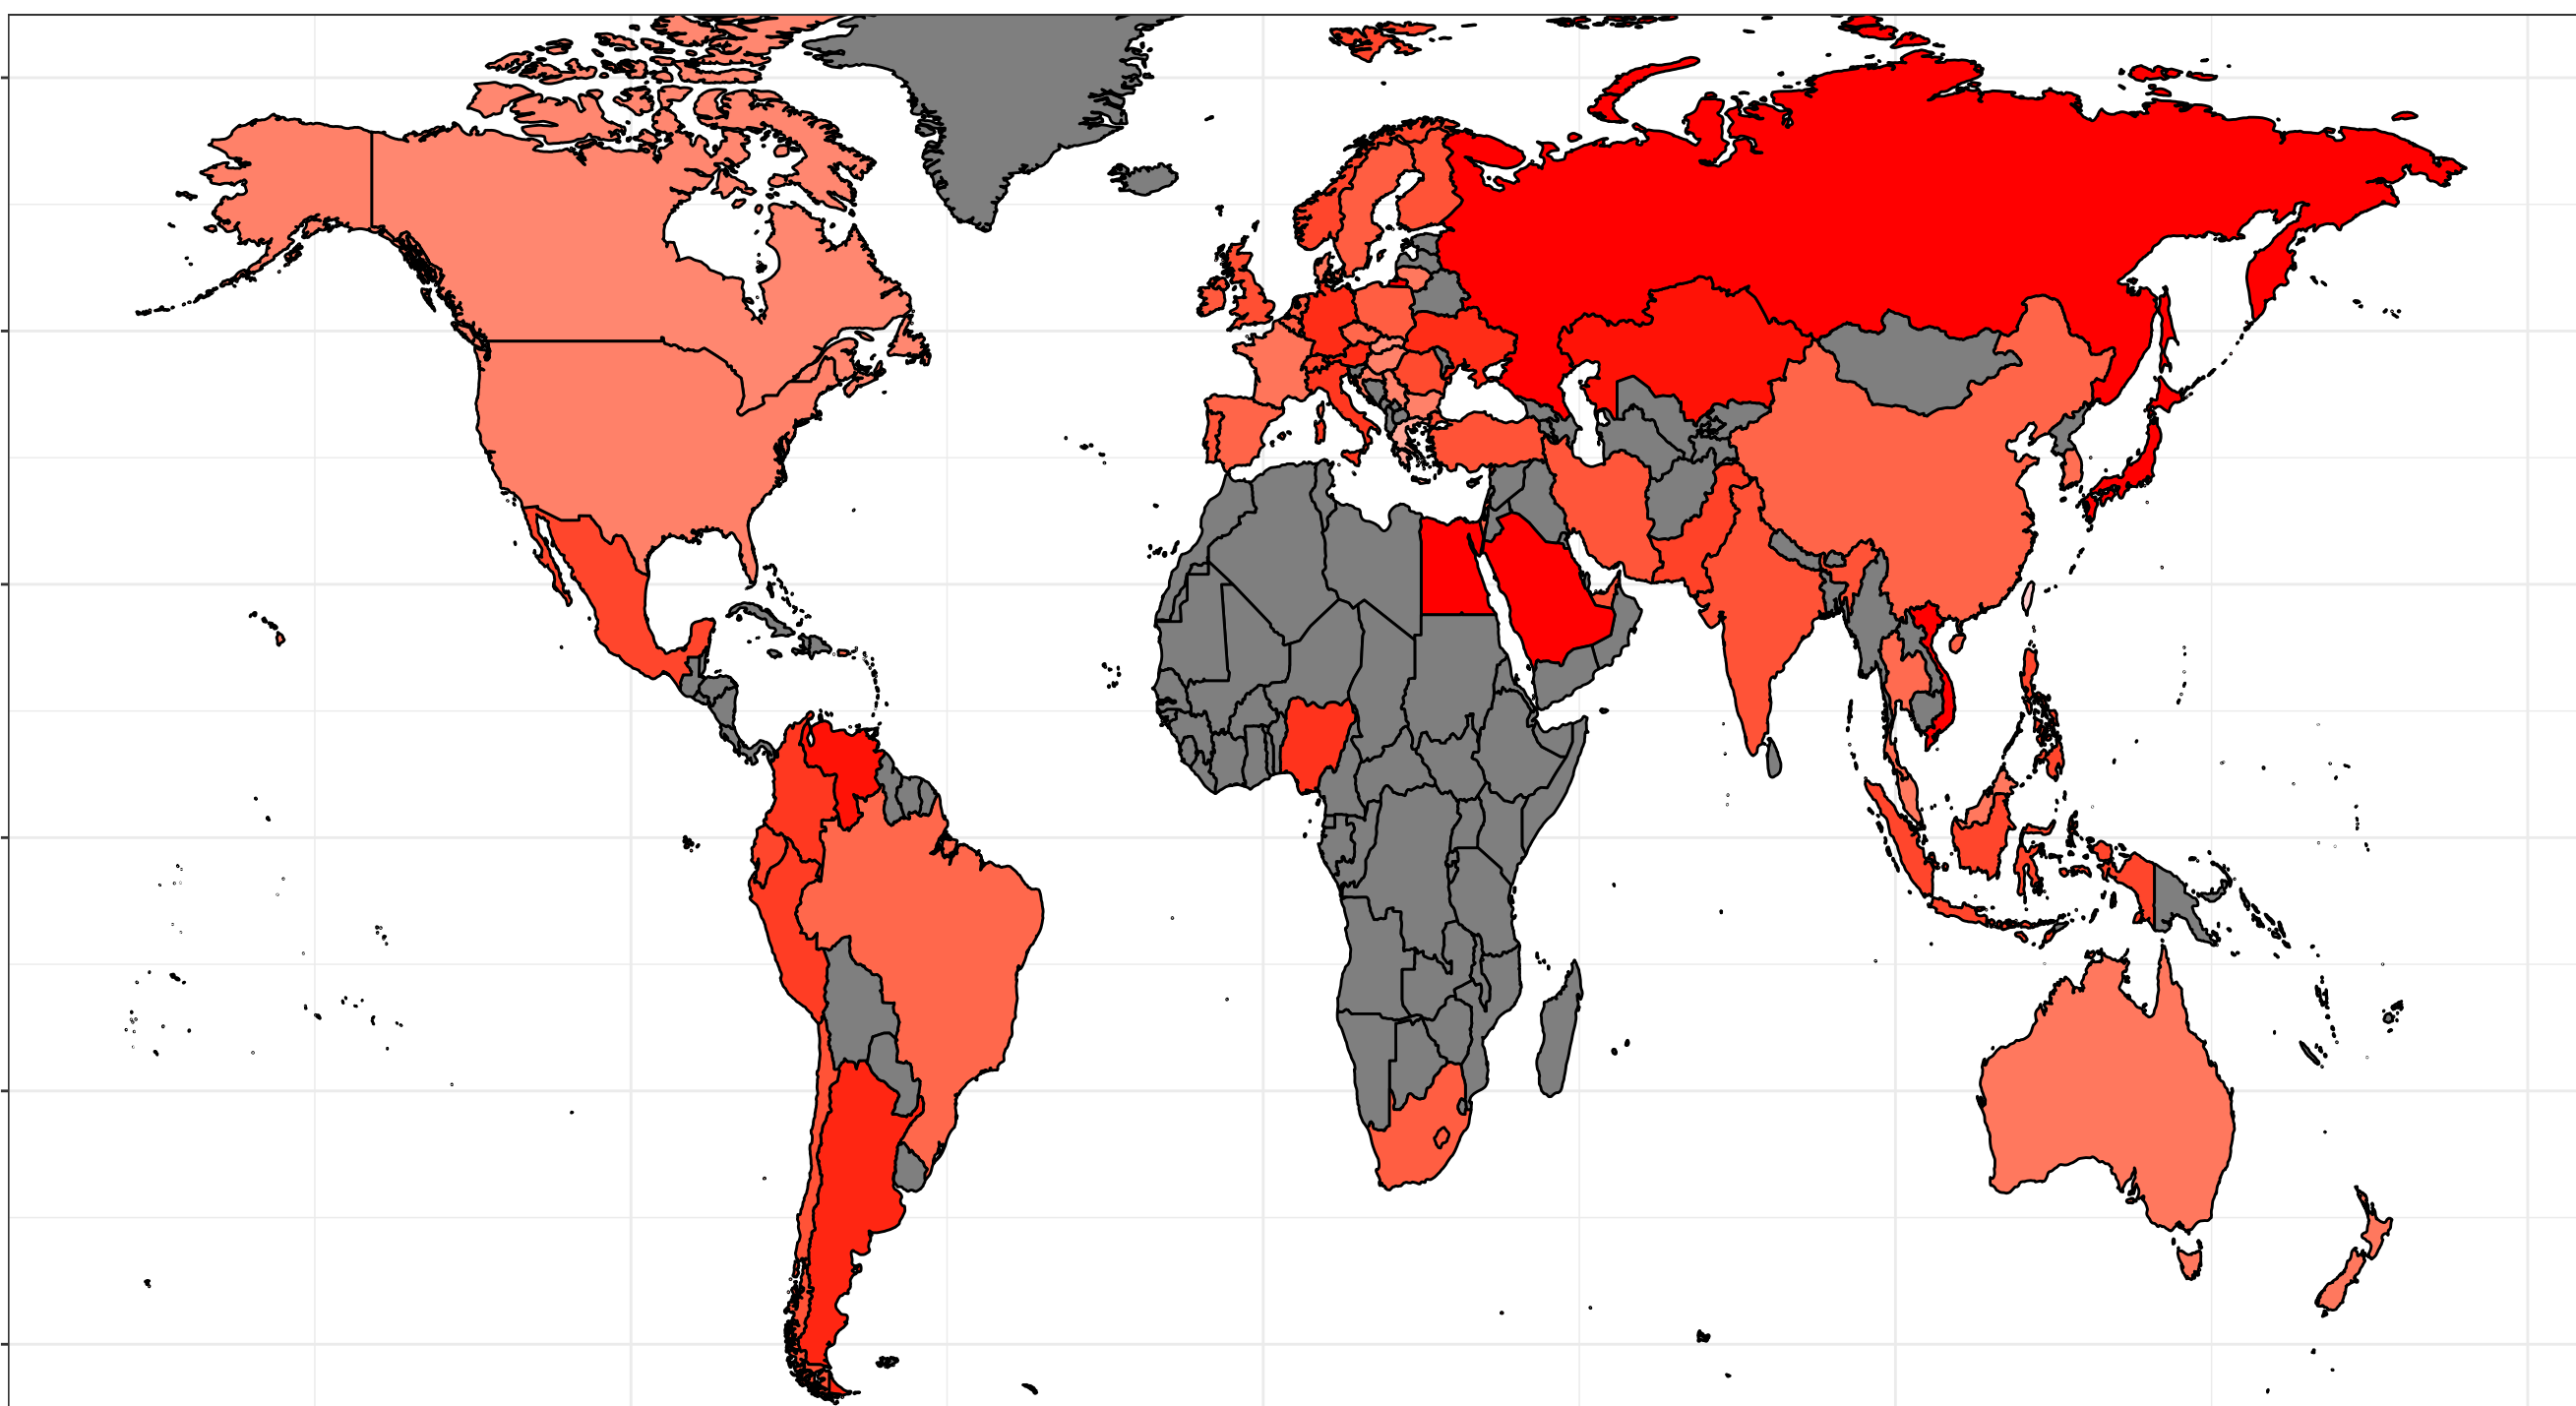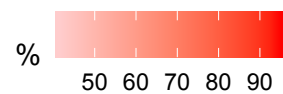

Supplement: s1 [file s1]

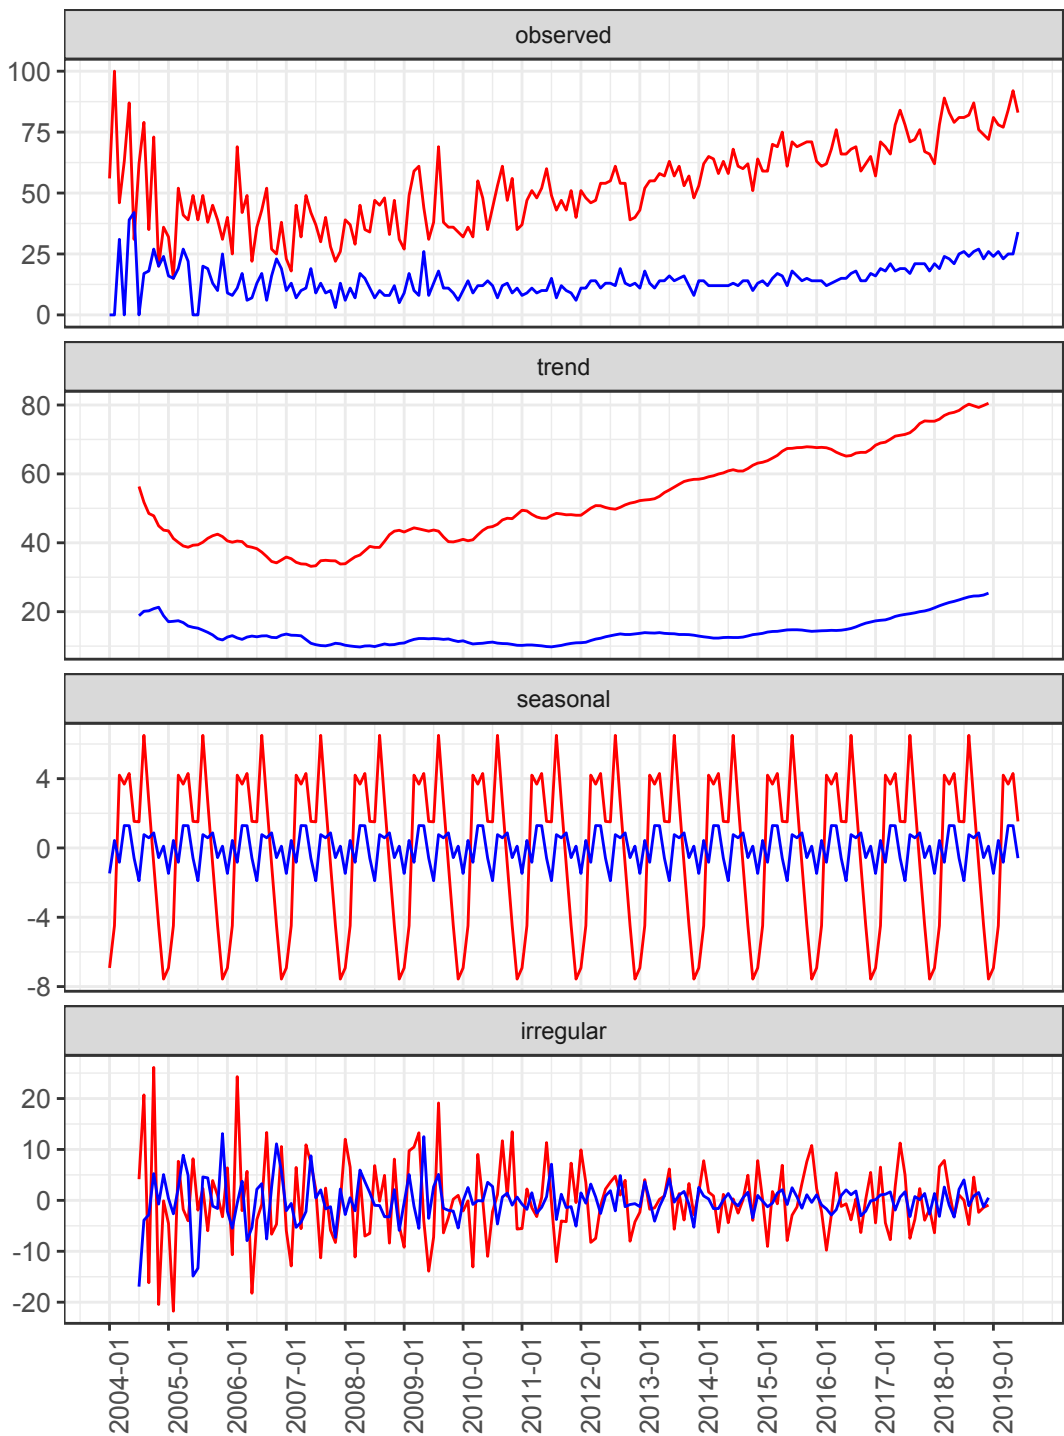

Keyword topic — Antibiotic — Probiotic

Supplement: s1 [file s1]

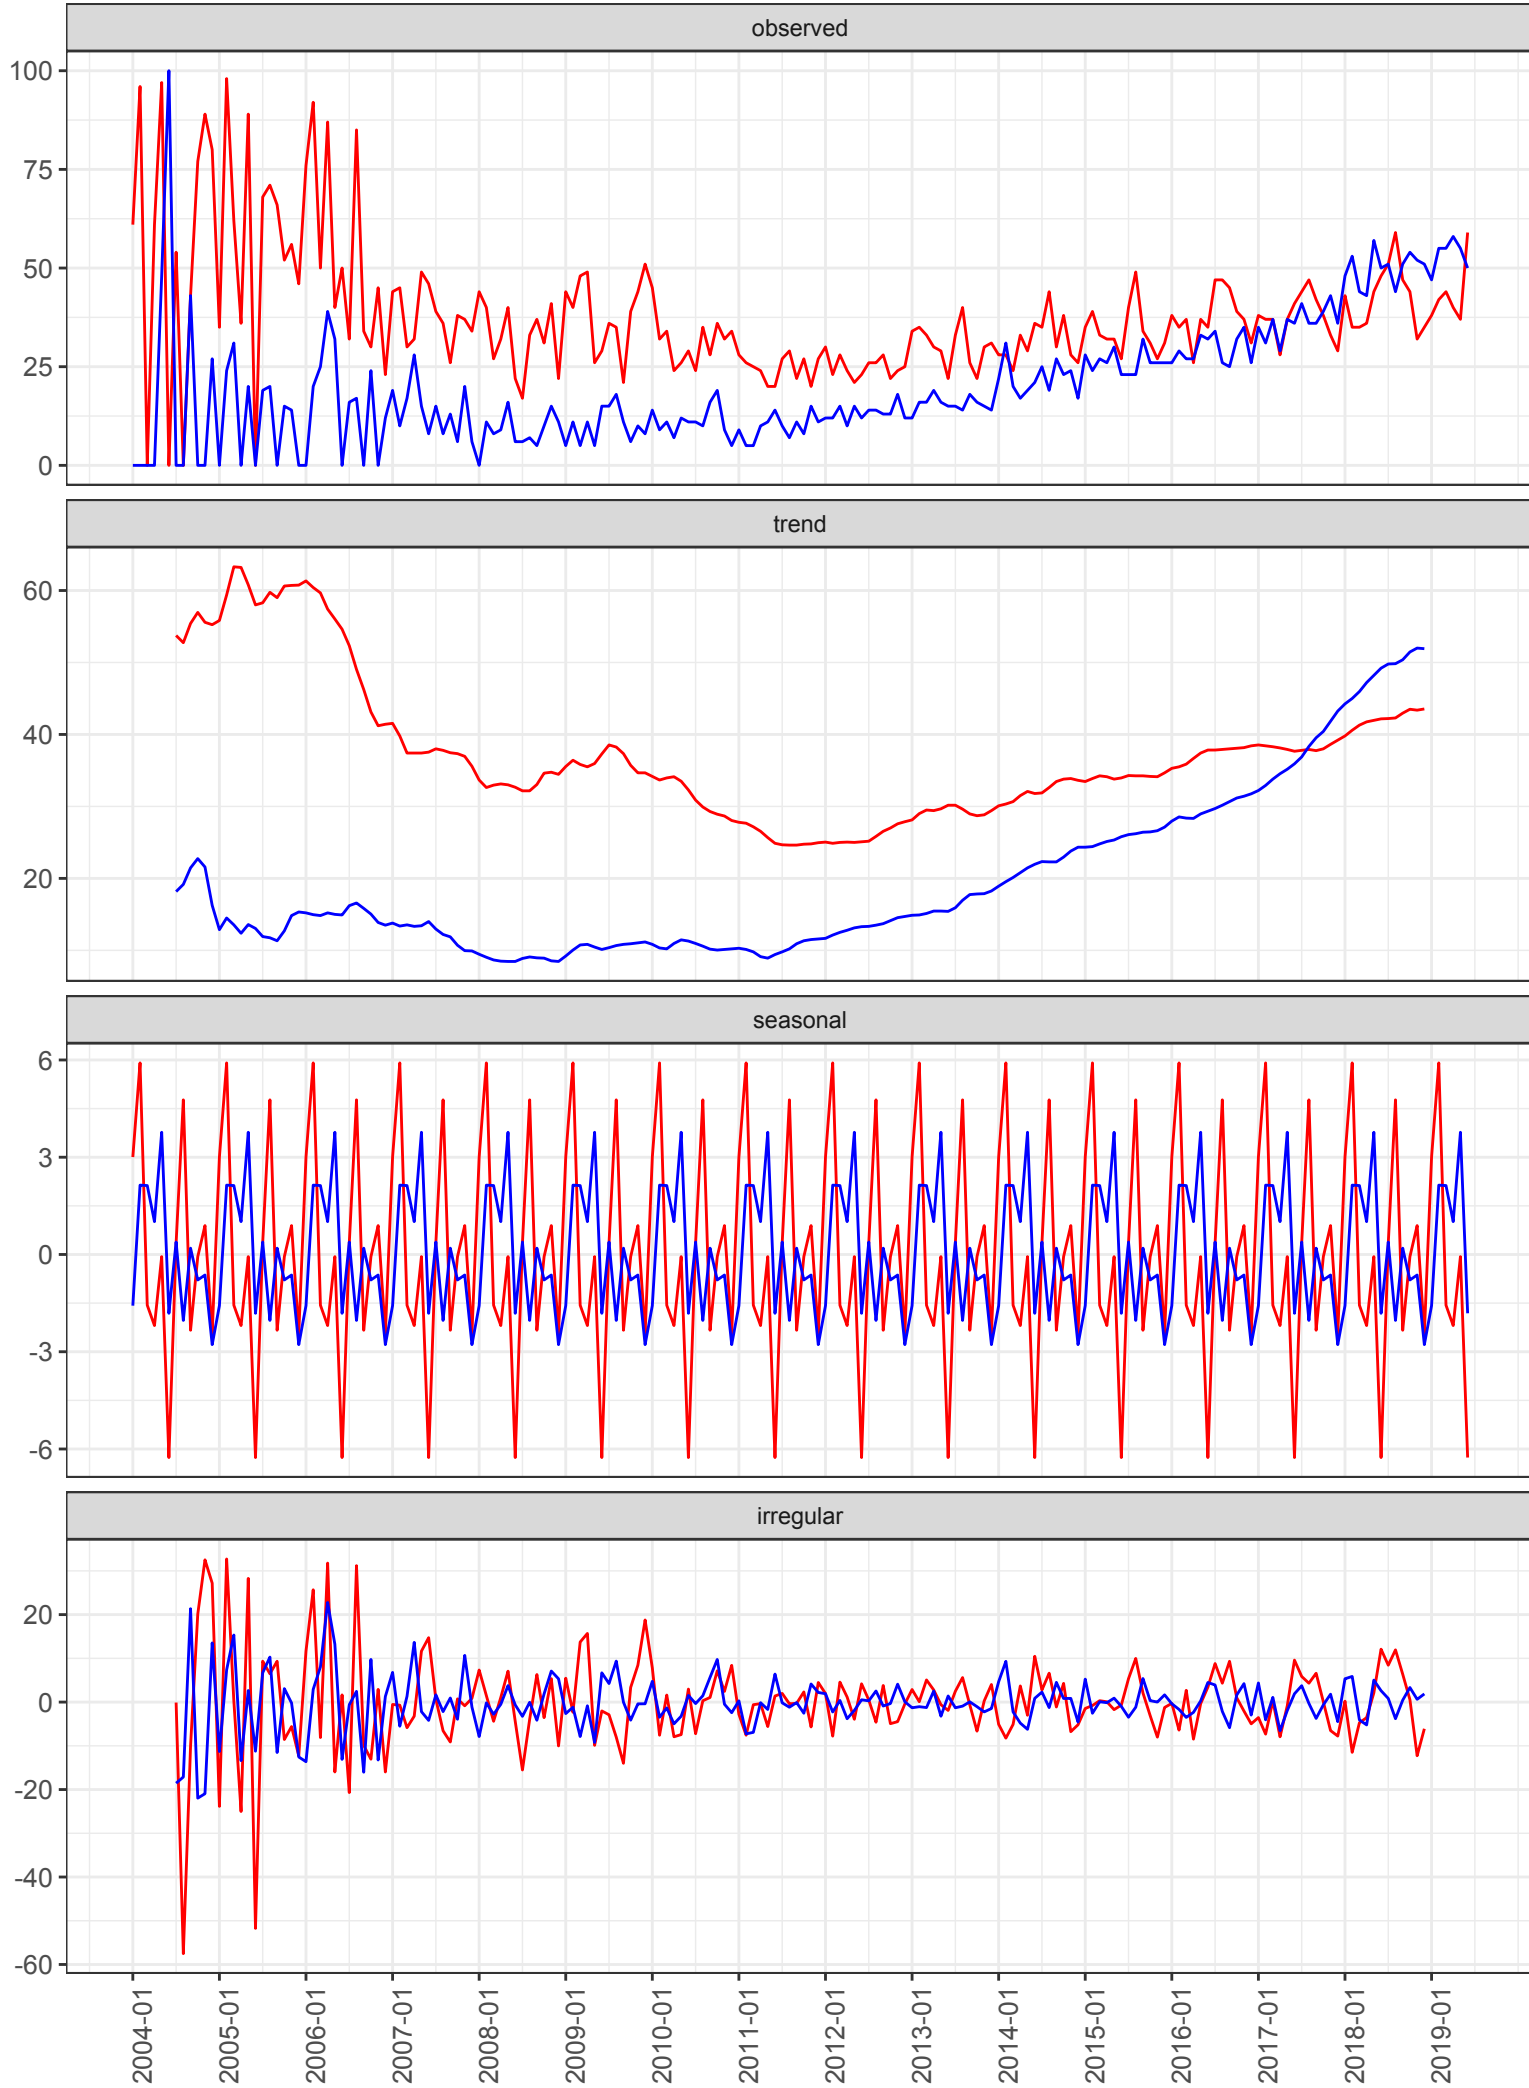

Keyword topic — Antibiotic — Probiotic

Supplement: s1 [file s1]

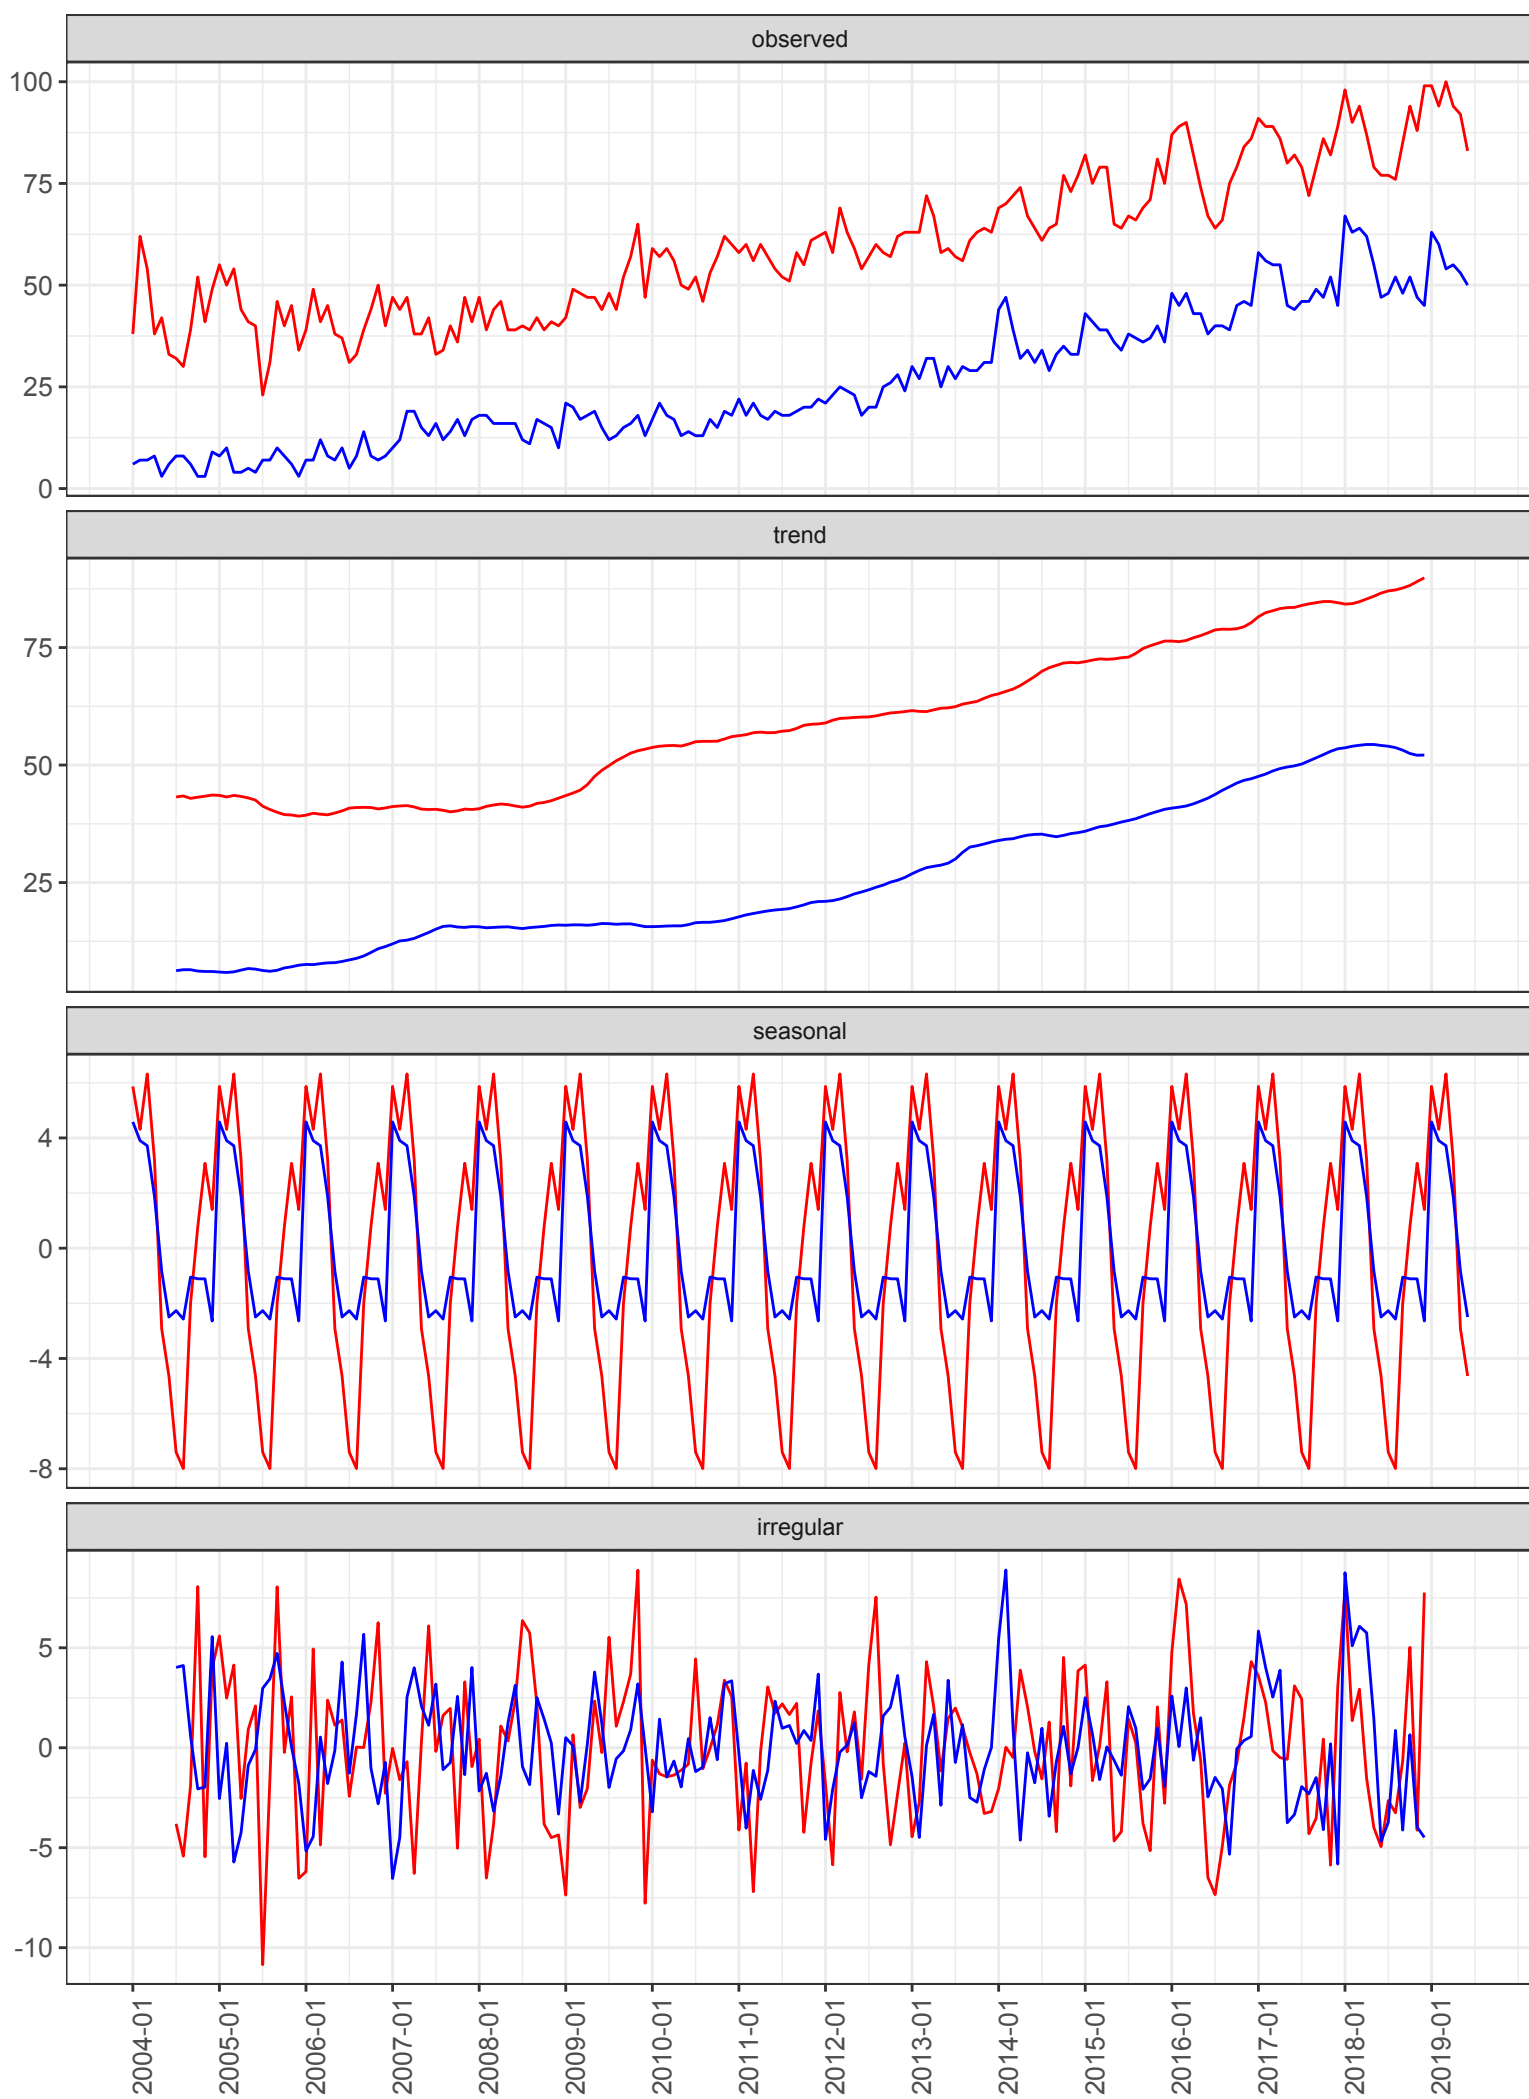

Keyword topic — Antibiotic — Probiotic

Supplement: s1 [file s1]

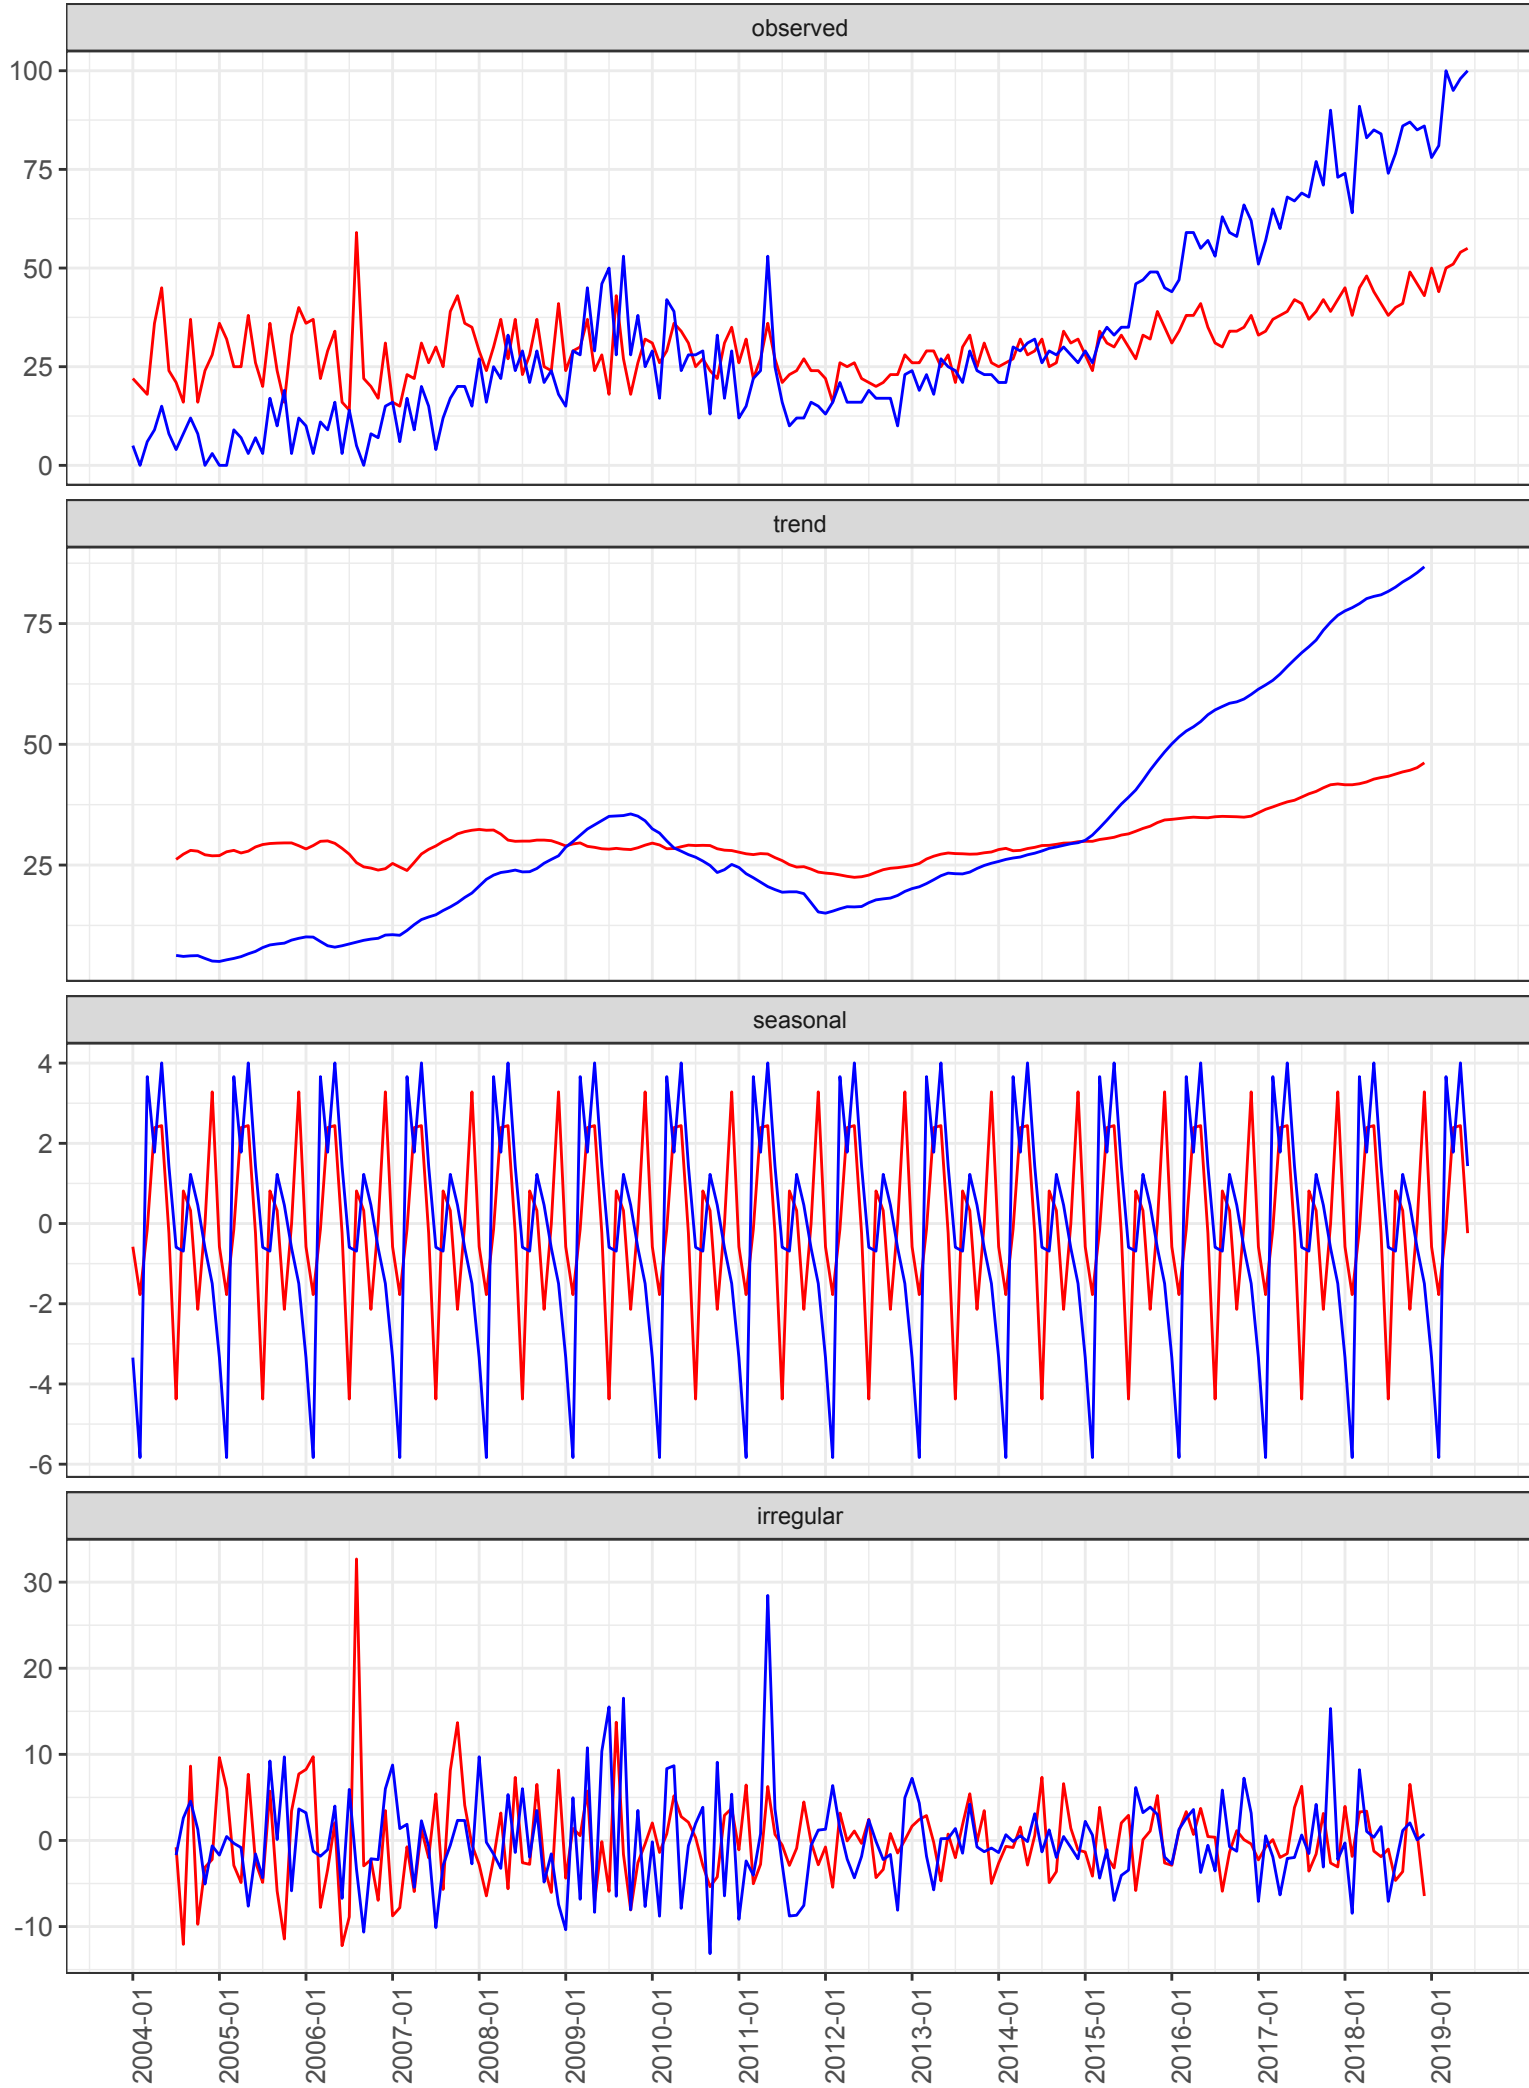

Keyword topic — Antibiotic — Probiotic

Supplement: s1 [file s1]

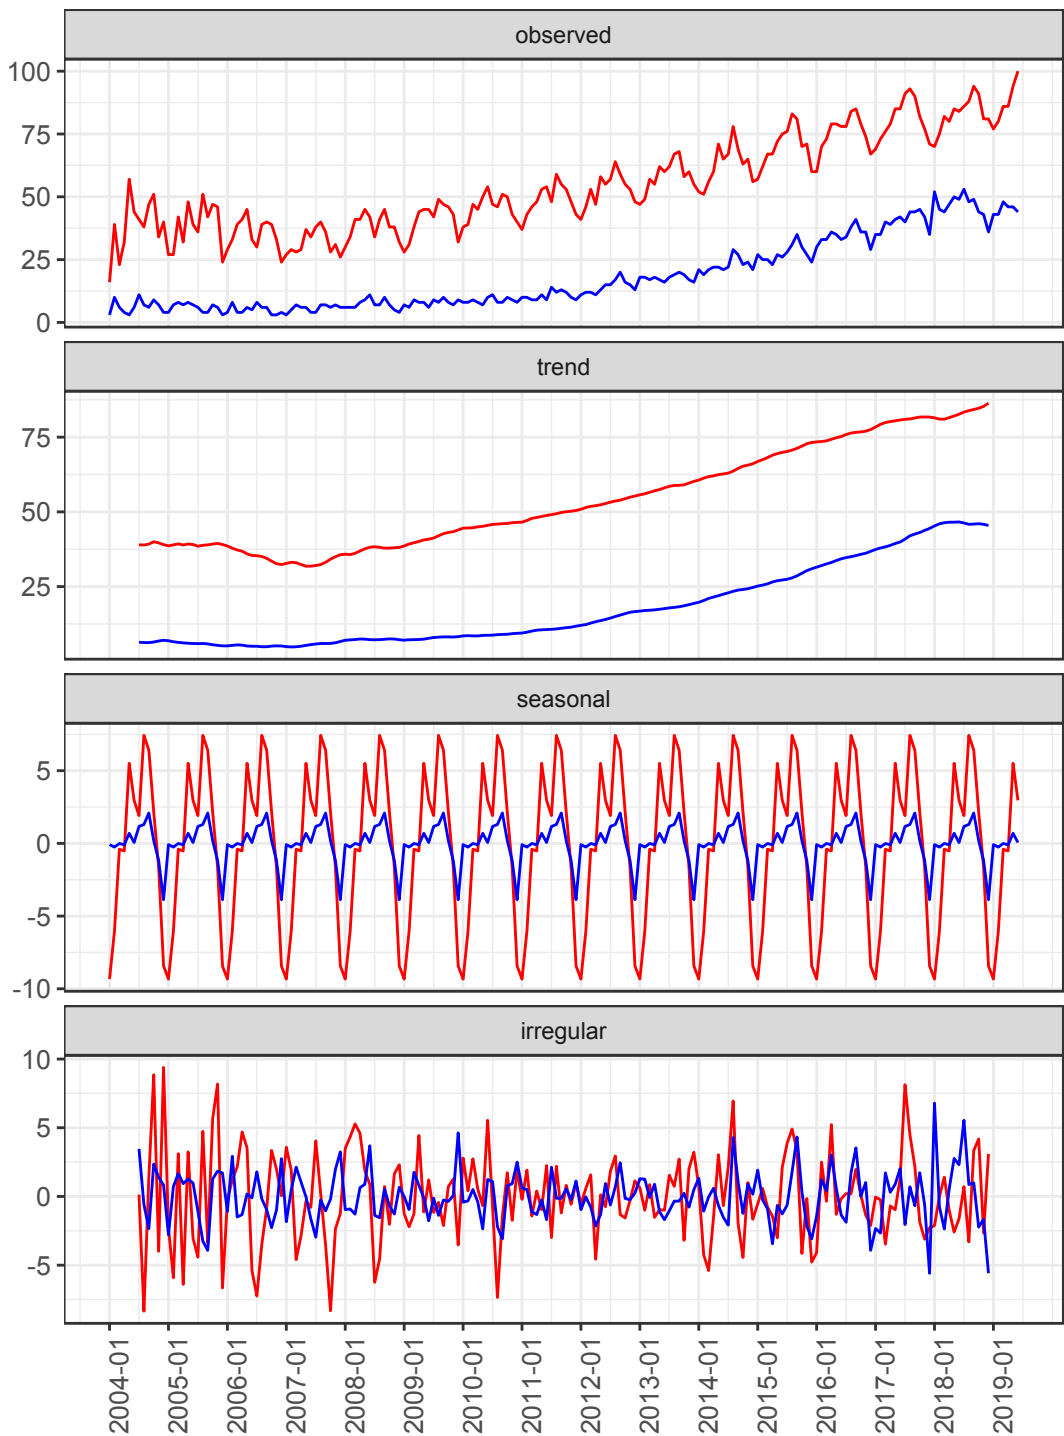

Keyword topic — Antibiotic — Probiotic

Supplement: s1 [file s1]
